# Supplementary material for: Mapping surface tension induced menisci with application to tensiometry and refractometry
Source: Royal Society of Chemistry journal article supplement (doi:10.1039/c5sm00497g), 2015-01-01
Supplement: c5sm00497g1.pdf [file c5sm00497g1.pdf]

## 1 Supplementary Information:

### 2 *Mapping surface tension induced meniscus with application to tensiometry and* 3 *refractometry*

4 Avanish Mishra,<sup>a</sup> Varun Kulkarni,<sup>b</sup> Jian-Wei Khor<sup>a</sup> and Steve Wereley<sup>\*a</sup>

5 <sup>a</sup> Birck Nanotechnology Centre, School of Mechanical Engineering, Purdue University, West  
6 Lafayette, IN – 47907

7  
8 <sup>b</sup> Maurice J. Zucrow Laboratories, School of Mechanical Engineering, Purdue University, West  
9 Lafayette, IN – 47907

10  
11

#### 12 1. Refraction at the inclined plate

13

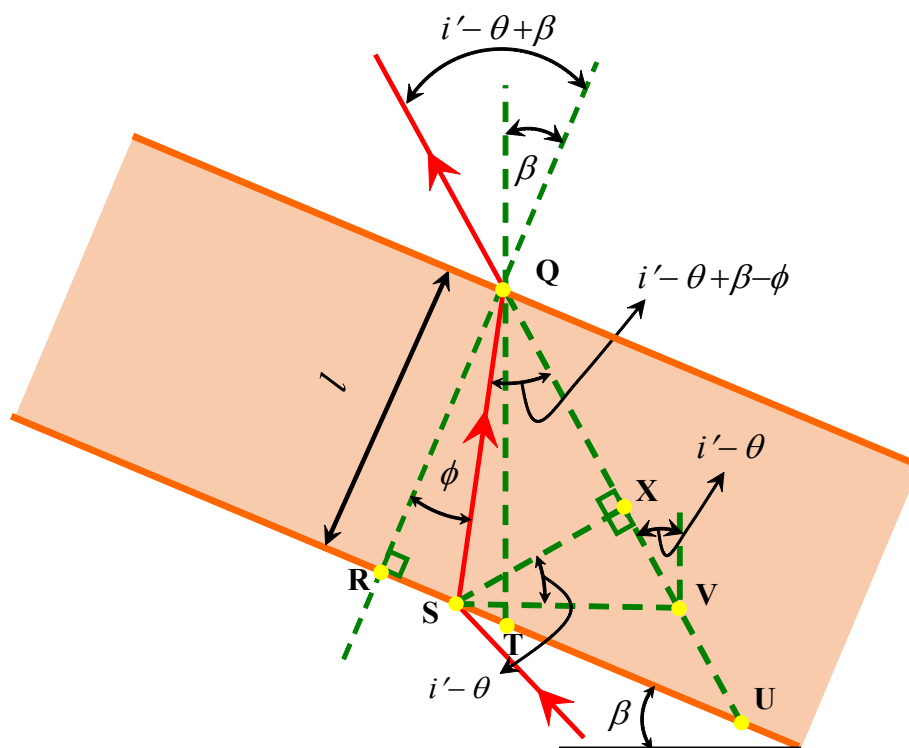

14

15 **Fig. S1** Optics inside the inclined flat plate. The solid red line corresponds to the incident/refracted  
16 ray. The green dashed lines are construction lines used to determine various geometrical distances.

17

18 In the ensuing section, we derive an analytical expression for  $MM^o$ , the displacement of the point  
 19 **M** due to refraction at the inclined glass plate. To begin with we describe various quantities as  
 20 indicated in Fig. S1. Point **S** corresponds to the location where the incident ray from the point **M**  
 21 hits the flat plate. Point **Q** is where the refracted ray exits the flat plate. Thus,  $QS$  is the distance  
 22 traversed along its path.  $l$  ( $= QR$ ) is the thickness of the flat plate in the incidence plane. As  
 23 mentioned before,  $\beta$  is the angle of inclination of the plate.  $i'$ , is the angle of incidence at the  
 24 meniscus which is refracted at an angle  $i$ .  $\theta$ , is the angle of the surface slope which is,  
 25  $\partial h / \partial x = -\tan \theta$ . In terms of the above quantities, we note that the angle of refraction of the  
 26 emerging refracted ray is given by,  $i' - \theta + \beta$  with respect to the surface normal of the inclined  
 27 plate. It is important to recognize that  $SV$  in Fig. S1 is same as  $MM^o$ .

28 First we need to estimate the angle  $\phi$ . From the Snell Descartes law, with  $n'$  and  $n_g$  representing  
 29 the refractive indices of the liquid and glass medium, we obtain,

$$30 \quad \frac{n_g}{n'} = \frac{\sin(i' - \theta + \beta)}{\sin \phi} \quad \backslash * \text{MERGEFORMAT (1)}$$

31 Since,  $i'$  and  $\theta$  is very small (weak slope and paraxial approximation), eqn (1) reduces to,

$$32 \quad \therefore \frac{n_g}{n'} = \frac{\sin \beta}{\sin \phi} \quad \backslash * \text{MERGEFORMAT (2)}$$

33 From eqn (2), we may derive an expression for  $\phi$  as

$$34 \quad \phi = \sin^{-1} \left( \frac{n' \sin \beta}{n_g} \right) \quad \backslash * \text{MERGEFORMAT (3)}$$

35 In order to determine  $SV$ , we would need to calculate a few intermediate quantities which are  
 36 described in the steps below. We first consider right angled  $\Delta QRS$ . Here

$$37 \quad QS = \frac{l}{\cos \phi} \quad \backslash * \text{MERGEFORMAT (4)}$$

38 Similarly, from  $\Delta QSX$  and  $\Delta SVX$  we have,

$$39 \quad SX = \left( \frac{l}{\cos \phi} \right) \sin(i' - \theta + \beta - \phi) \quad \backslash * \text{MERGEFORMAT (5)}$$

40 and,  $SV = \left[ \frac{l}{\cos \phi} \right] \left[ \frac{\sin(i' - \theta + \beta - \phi)}{\cos(i' - \theta)} \right]$  \\* MERGEFORMAT (6)

41 Once again for small  $i'$  and  $\theta$  we have

42  $SV = \left( \frac{l}{\cos \phi} \right) \sin(\beta - \phi)$  \\* MERGEFORMAT (7)

43

44 **2. Representation of  $\hat{n}$  in terms of  $\hat{s}$  and  $\mathbf{CM}''$**

45 The vector  $\hat{n}$  can be expressed using  $\hat{s}$  and  $\mathbf{CM}''$  as,

46  $\hat{n} = a\hat{s} + b \frac{\mathbf{CM}''}{|\mathbf{CM}''|}$  \\* MERGEFORMAT (8)

47 The coefficients,  $a$  and  $b$  can be determined by the following geometric relations

48  $\hat{n} \cdot \hat{s} = -\sin \theta$  \\* MERGEFORMAT (9)

49  $\hat{n} \cdot \frac{\mathbf{CM}''}{|\mathbf{CM}''|} = -\cos i$  \\* MERGEFORMAT (10)

50  $\hat{s} \cdot \frac{\mathbf{CM}''}{|\mathbf{CM}''|} = \sin(i - \theta)$  \\* MERGEFORMAT (11)

51 Using the above geometric relations, we get

52  $\hat{n} = \frac{\cos i \sin(i - \theta) - \sin \theta}{\cos^2(i - \theta)} \hat{s} + \frac{\sin \theta \sin(i - \theta) - \cos i}{\cos^2(i - \theta)} \frac{\mathbf{CM}''}{|\mathbf{CM}''|}$  \\* MERGEFORMAT

53 (12)

54 Using the weak slope and paraxial approximations, we get

55  $\hat{n} = i\hat{s} - \frac{\mathbf{CM}''}{|\mathbf{CM}''|}$  \\* MERGEFORMAT (13)

56

57 **3. Derivation of  $\mathbf{M}^0\mathbf{M}''$**

58

59 Considering  $\Delta IKM$  and  $\Delta IKM''$  in the incidence plane (as shown in Fig. 3 in the manuscript), we  
 60 obtain

61 
$$\mathbf{M}^o\mathbf{M}'' = \mathbf{KM}'' - \mathbf{KM}^o \quad \backslash * \text{ MERGEFORMAT (14)}$$

62 
$$\mathbf{KM}'' = h_p(i - \theta)\hat{s} \quad \backslash * \text{ MERGEFORMAT (15)}$$

63 
$$\mathbf{KM}^o = h_p(i' - \theta)\hat{s} \quad \backslash * \text{ MERGEFORMAT (16)}$$

64 
$$\mathbf{M}^o\mathbf{M}'' = \alpha h_p i \hat{s} \quad \backslash * \text{ MERGEFORMAT (17)}$$

65

66 **4. Theoretical meniscus profile on an inclined plate**

67

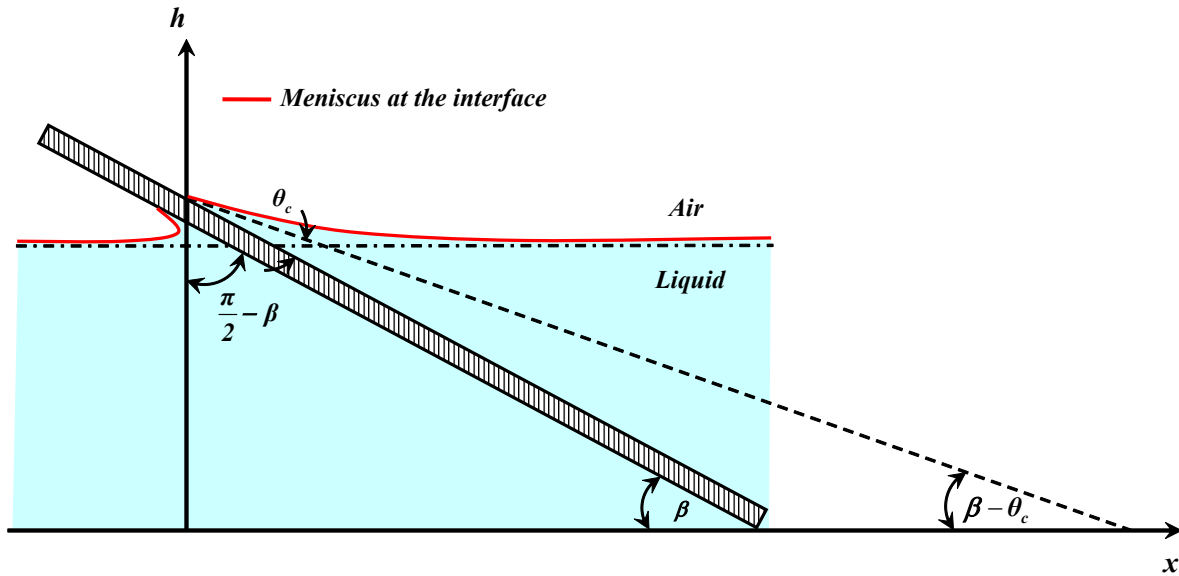

68

69 **Fig. S2** Sketch of inclined flat plate liquid meniscus and coordinate axes. Shaded rectangle in the  
 70 figure corresponds to the flat plate.

71

72 To obtain a theoretical expression for the meniscus, the Young-Laplace equation is solved in  
 73 Cartesian coordinates<sup>1</sup>. The governing equation reads as

74 
$$\frac{d^2h}{dx^2} = \left(\frac{\rho g}{\sigma} h\right) \left[1 + \left(\frac{dh}{dx}\right)^2\right]^{3/2} \quad \backslash* \text{MERGEFORMAT (18)}$$

75 subject to the boundary conditions,

76 
$$\frac{dh}{dx} = -\tan \alpha \quad \text{at } x = 0 \quad \backslash* \text{MERGEFORMAT (19)}$$

77 
$$h \rightarrow 0 \quad \text{at } x \rightarrow \infty \quad \backslash* \text{MERGEFORMAT (20)}$$

78 Here,  $\alpha = \beta - \theta_c$ , where  $\theta_c$  is the contact angle between the liquid and gas as shown in Fig. S2. In  
79 the case where the slope is slender *i.e.*  $dh/dx \ll 1$  eqn (18) transforms to

80 
$$\frac{d^2h}{dx^2} = \left(\frac{\rho g}{\sigma} h\right) \quad \backslash* \text{MERGEFORMAT (21)}$$

81 Solving eqn (21) using the boundary conditions specified in eqn (19) and eqn (20), we obtain eqn  
82 (22), the expression for the meniscus height ( $h$ ) as a function of the distance ( $x$ )

83 
$$\frac{h}{l_c} = \tan(\alpha) e^{-x/l_c} \quad \backslash* \text{MERGEFORMAT (22)}$$

84 where  $l_c$  is the capillary length,  $\sqrt{\sigma / \rho g}$ .

85

## 86 **5. Materials and Methods**

87 A glass container of 15 cm diameter and 75 mm height was used for experiments. The bottom  
88 surface of the container was optically flat. Images were captured using an 8 bit Nikon DS-fi1  
89 camera equipped with a 40 mm Micro-Nikkor lens. The f-stop was kept at 22 in all the  
90 measurements. Camera CCD sensor is 8.70 mm wide and 6.53 mm high. Physical pixel size is 3.4  
91  $\mu\text{m}$ . For background illumination, we used a 100W Nikon halogen lamp (Fig. S3). It is important  
92 note that any uniform light source will be sufficient for background illumination. A glass diffuser  
93 was utilized as a background pattern. A distribution of diameter of dots is being shown in Fig. S4.  
94 Though not used in this work, a high resolution dot pattern printed with a photomask printer on a  
95 transparent sheet will also be an excellent choice for a background pattern. In the current

96 experiments, images were acquired using Nikon NIS-Elements F 3.0 software. The original images  
97 were recorded with a resolution of  $2560 \times 1920$  pixel<sup>2</sup> but for analysis, we decided to work with a  
98 subset of the area in the original image ( $208 \times 1232$  pixel<sup>2</sup>) as it is sufficient for finding surface  
99 tension and contact angle. A 0.15 mm thick glass plate was used as the inclined flat plate. Before  
100 use, glass plate was solvent cleaned by ultrasonication for 3 minutes each in acetone, isopropanol  
101 and methanol. Subsequently, the plate was carefully washed with distilled water, blow dried with  
102 nitrogen gas, and plasma treated to ensure uniform wetting. Before use, it was microscopically  
103 inspected for any dirt or impurity on the surface. The angle of the inclined plate was directly  
104 measured by a degree indicator on the rotation stage. We also used a camera positioned in side  
105 view to confirm the angle of the plate. Public domain image processing software ImageJ was used  
106 to measure the angle of the plate from the recorded images. All the experiments were performed  
107 at a temperature of  $293 \pm 1$  K. For finding surface tension, refractive index and contact angle,  
108 experiments were repeated ten times for each liquid and one standard deviation of the data was  
109 used as a measure of uncertainty in the measured values.

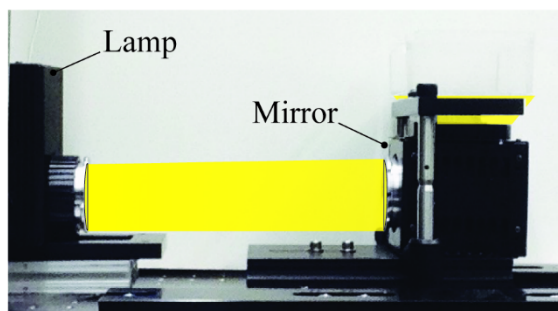

110

111 **Fig. S3** Background illumination setup. A  $45^\circ$  mirror reflects light from the lamp in to the glass  
112 container.

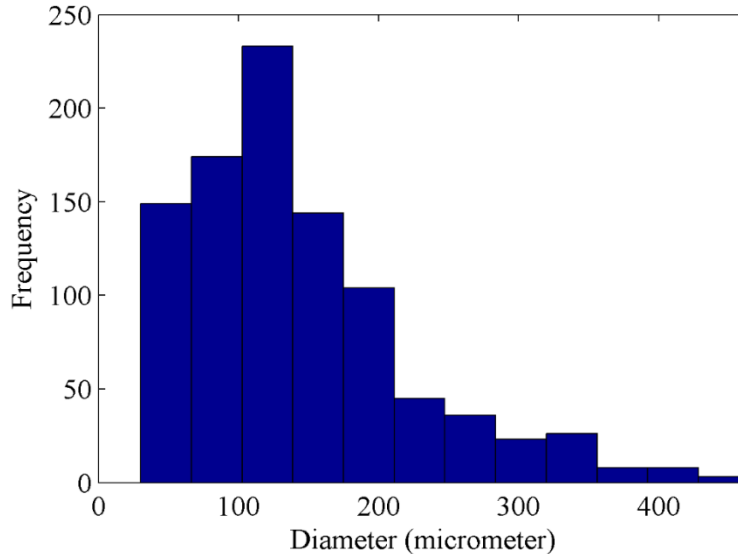

113

114 **Fig. S4** Distribution of size of dots

115

## 116 **6. PIV Processing Parameters**

117 To evaluate the displacement field, first the images were preprocessed with a local low pass filter.  
 118 It removes any variation in the background intensity by subtracting the local background from the  
 119 original image. We then performed cross-correlation in multi pass mode with decreasing window  
 120 sizes. The cross correlation started with 50% overlapping windows of  $64 \times 64$  pixel<sup>2</sup> and concluded  
 121 with a window size of  $16 \times 16$  pixel<sup>2</sup> with 50% overlap. Multiple iterations were performed for  
 122 each window size. For starting window size of  $64 \times 64$  pixel<sup>2</sup>, 3 iterations were performed. For  
 123 final window size of  $16 \times 16$  pixel<sup>2</sup>, 5 iterations were performed. The computed vectors were post-  
 124 processed for removal of outliers. During post-processing, vectors with peak ratio less than 1.3  
 125 were removed. A 4-pass regional median filter with 'strongly remove and iteratively replace' option  
 126 was utilized to eliminate groups of spurious vectors. For each vector, median filter computes the  
 127 median of 8 surrounding vectors and keeps the vector if it falls within the range of median  
 128  $\text{vector} \pm (2 \times \text{root mean square (rms) of neighbor vectors})$ . In second pass, vectors which do not have  
 129 3 or more neighboring vectors left from previous pass were removed. In third pass all the good  
 130 vectors which fall in the range of  $\text{median vector} \pm (3 \times \text{rms of neighbor vectors})$  were reinserted.  
 131 Finally, in fourth pass groups with less than 5 vectors were removed. In vector post-processing,  
 132 after removal of spurious vectors, empty spaces were filled with new vectors by interpolation. It

133 is important to mention that less than 1.5 % vectors were filled by interpolation in all the cases.  
134 We used the PIVMat<sup>®</sup> toolbox developed by Moisy et al.<sup>2</sup> for surface height reconstruction. For  
135 fitting, we used the nonlinear least squares method with the robust option in MATLAB<sup>®</sup>.

136

## 137 **References**

138 1 G. K. Batchelor, *An Introduction to Fluid Dynamics*, Cambridge University Press, 2000.

139 2 F. Moisy, M. Rabaud and K. Salsac, *Exp. Fluids*, 2009, **46**, 1021–1036.

140
